# Supplementary material
Source: PubMed Central journal article supplement (PMC9215048)
Supplement: 12889_2022_13623_MOESM2_ESM.pdf [file 12889_2022_13623_MOESM2_ESM.pdf]

Today's Date: day / month / year

Study ID: \_\_\_\_\_

Interviewer ID: \_\_\_\_\_

Location/Facility: \_\_\_\_\_

|     |                                                                          |                                                                                                                         |                |
|-----|--------------------------------------------------------------------------|-------------------------------------------------------------------------------------------------------------------------|----------------|
| E7  | What type of hormonal contraception do you use?                          | Injection.....1<br>Pill.....2<br>Implant (implanon).....3<br>Other .....4<br>If OTHER, specify: _____<br>Refused.....-1 |                |
| E8  | Do you take other chronic medications?                                   | No.....0<br>Yes.....1<br>Refused..... -1                                                                                | →F1<br><br>→F1 |
| E9  | What other chronic medications do you take?                              | _____<br>[6 lines with 80 characters available per line]                                                                |                |
| E10 | In the past 6 months have you attended a traditional healer?             | No.....0<br>Yes.....1<br>Refused..... -1                                                                                |                |
| E11 | In the past 6 months have you taken medicines from a traditional healer? | No.....0<br>Yes.....1<br>Refused..... -1                                                                                |                |

























Today's Date: day / month / year

Study ID: \_\_\_\_\_

Interviewer ID: \_\_\_\_\_

Location/Facility: \_\_\_\_\_

|    |                                                                                                   |                                                                                  |  |
|----|---------------------------------------------------------------------------------------------------|----------------------------------------------------------------------------------|--|
| L2 | How often have you been gossiped about because of your HIV status?                                | Never.....0<br>Once.....1<br>A few times.....2<br>Often.....3<br>Refused..... -1 |  |
| L3 | How often have you been verbally insulted, harassed and/or threatened because of your HIV status? | Never.....0<br>Once.....1<br>A few times.....2<br>Often.....3<br>Refused.....-1  |  |
| L4 | How often have you been physically assaulted because of your HIV status?                          | Never.....0<br>Once.....1<br>A few times.....2<br>Often.....3<br>Refused.....-1  |  |

**M. ALCOHOL USE SCREENING**

In this section, I will ask you some questions about your alcohol use. Please answer all of the questions that you are comfortable with. *Pull down menu for all with -1 last*

|    |                                                                     |                                                                                                                                              |                            |
|----|---------------------------------------------------------------------|----------------------------------------------------------------------------------------------------------------------------------------------|----------------------------|
| M1 | How often did you have a drink containing alcohol in the past year? | Never.....0<br>Monthly or less.....1<br>2-4 times a month.....2<br>2-3 times a week.....3<br>4 or more times a week.....4<br>Refused..... -1 | →N1<br><br><br><br><br>→N1 |
|----|---------------------------------------------------------------------|----------------------------------------------------------------------------------------------------------------------------------------------|----------------------------|
